# Supplementary material for: Pilomatrix Carcinoma: Report of Two Cases of the Head and Review of the Literature
Source: MDPI journal article supplement (doi:10.3390/curroncol30020109), 2023-01-19
Supplement: s1 [file s1]

Supplementals

# Pilomatrix Carcinoma: Report of Two Cases of the Head and Review of the Literature

Ludovica Toffoli <sup>1</sup>, Giulia Bazzacco <sup>1,\*</sup>, Claudio Conforti <sup>1</sup>, Claudio Guarneri <sup>2</sup>, Roberta Giuffrida <sup>3,\*</sup>, Enrico Zelin <sup>1</sup>, Nicola di Meo <sup>1</sup> and Iris Zalaudek <sup>1</sup>

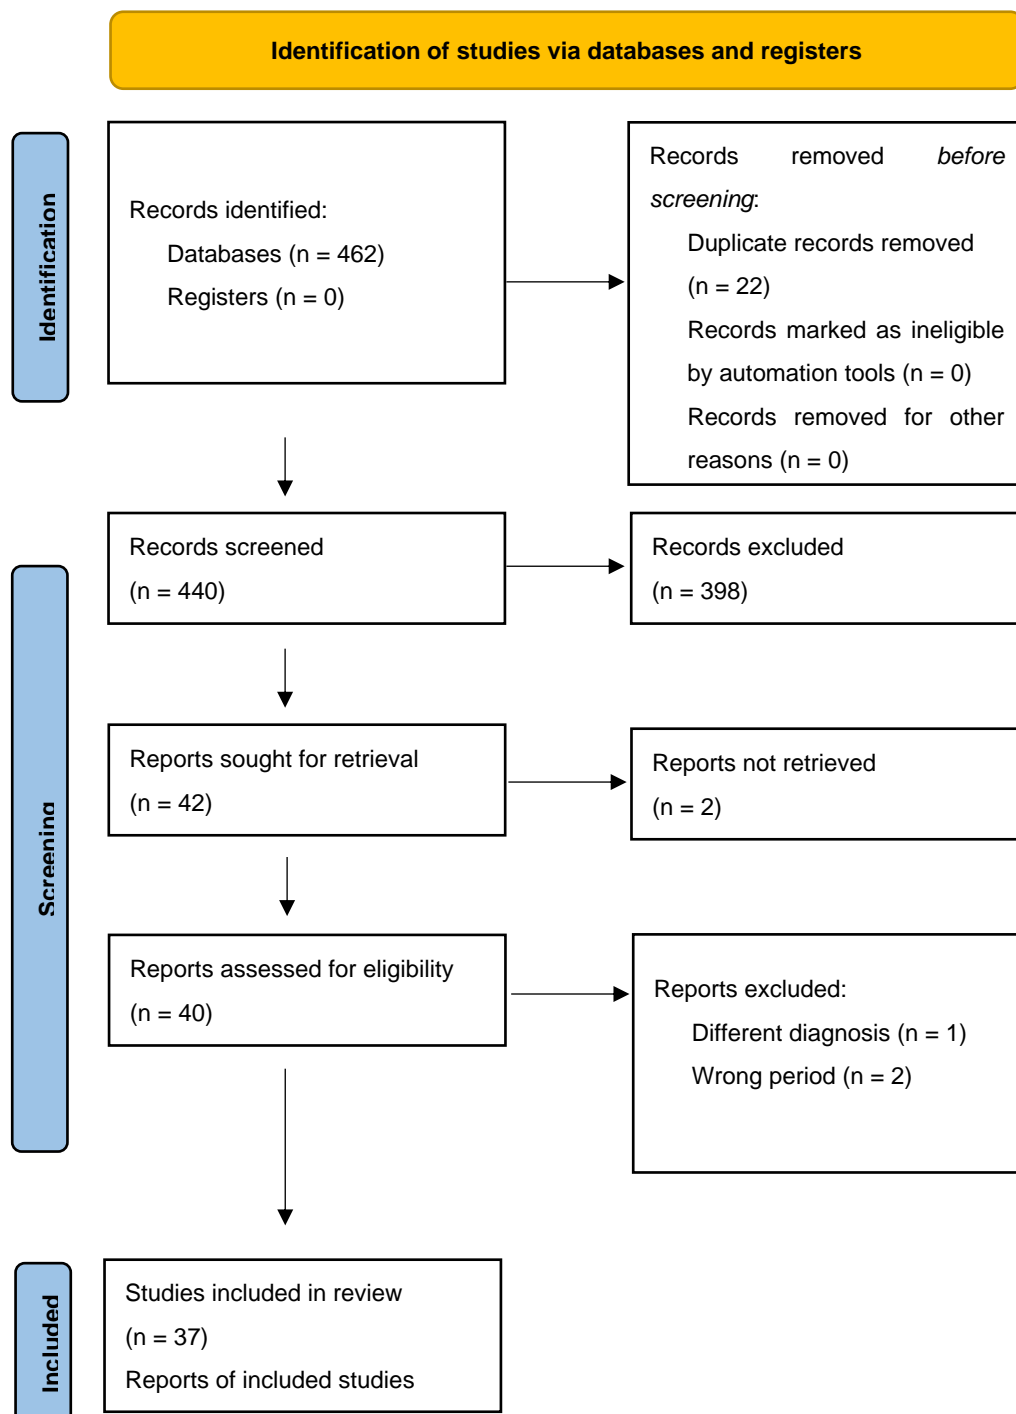

---

**Figure S1.** PRISMA 2020 flow diagram for new systematic reviews which included searches of databases and registers only.

*From:* Page MJ, McKenzie JE, Bossuyt PM, Boutron I, Hoffmann TC, Mulrow CD, et al. The PRISMA 2020 statement: an updated guideline for reporting systematic reviews. *BMJ* 2021;372:n71. doi: 10.1136/bmj.n71

For more information, visit: <http://www.prisma-statement.org/>
